# Supplementary material
Source: Springer Nature journal article supplement (https://www.springermedizin.de/resource/supplementary/12865_2012_485_MOESM5_ESM.pdf/9428092)

**A**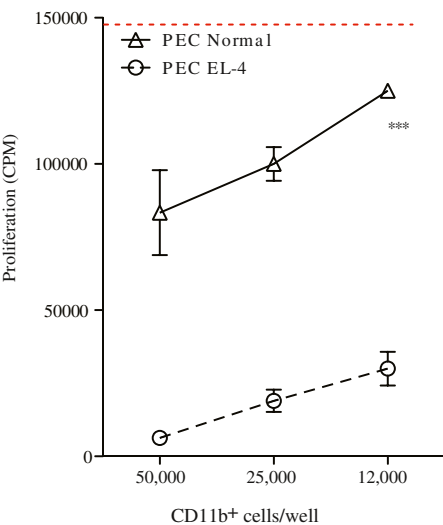**B**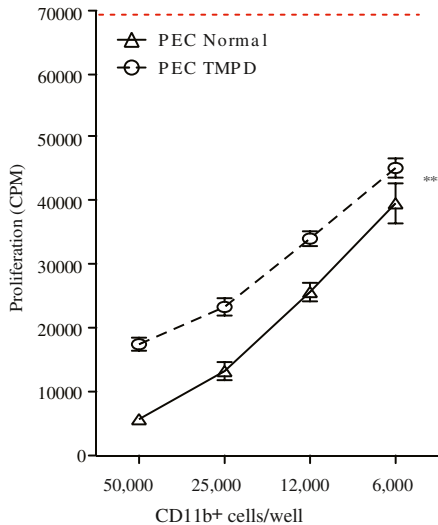**C**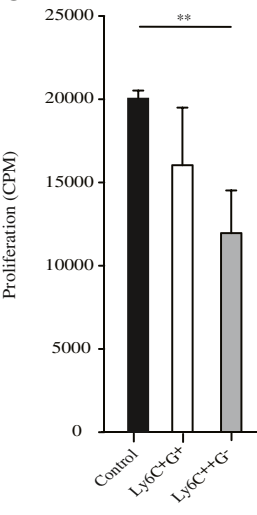**D**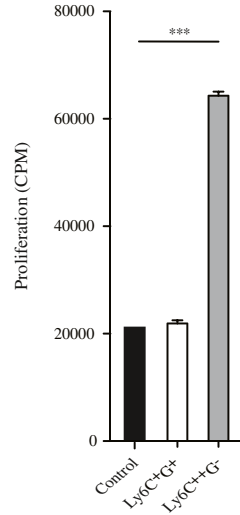

Supplement: MOESM5 [file 9428092]
